# Supplementary material for: Antibacterial activities of Miang extracts against selected pathogens and the potential of the tannin-free extracts in the growth inhibition of Streptococcus mutans
Source: PubMed Central journal article supplement (PMC11078415; doi:10.1371/journal.pone.0302717), 2024-05-08

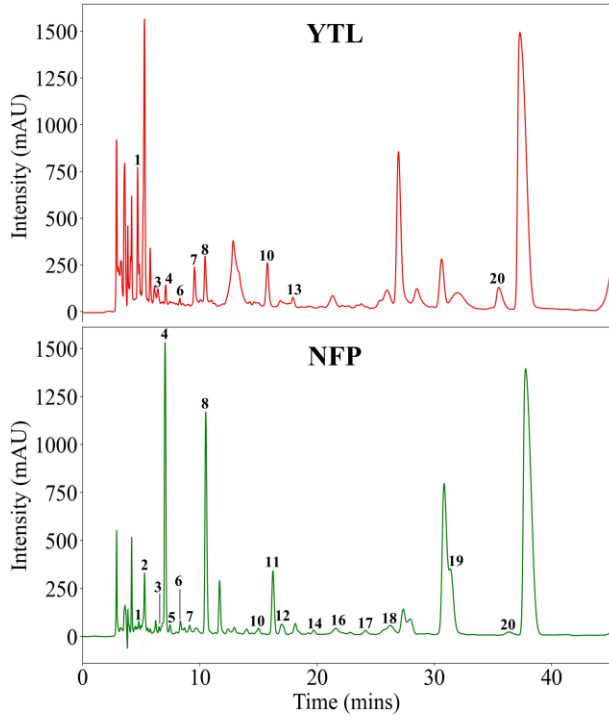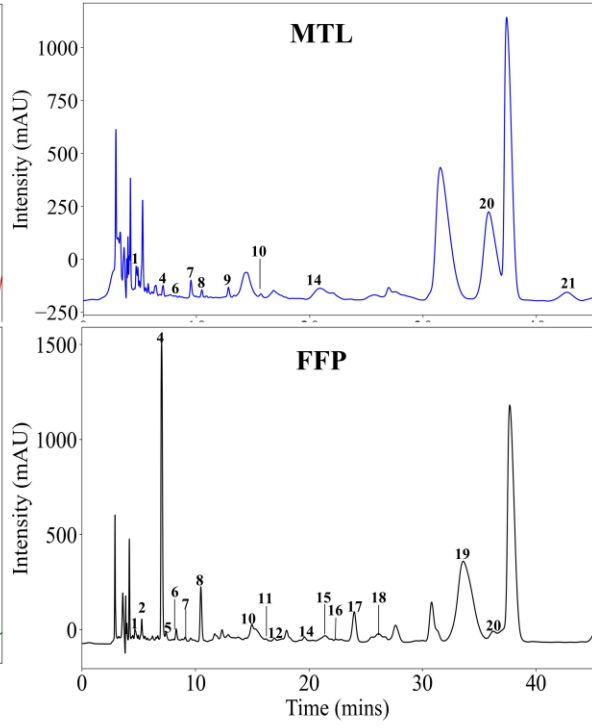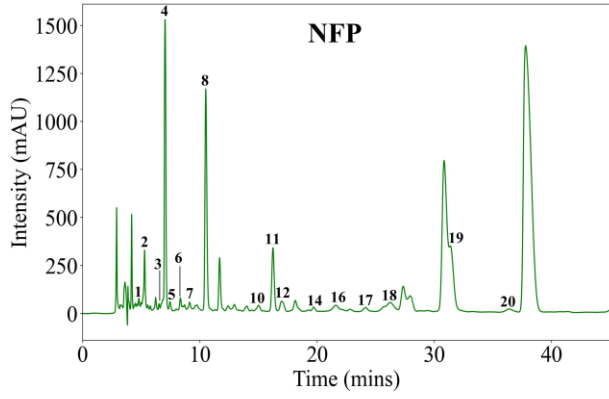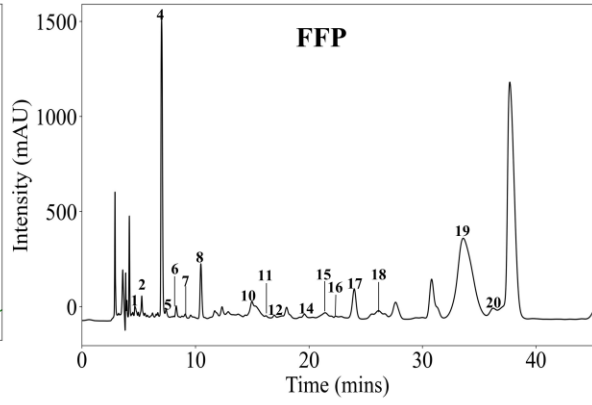

Supplement: pone.0302717.s001.pdf [file pone.0302717.s001.pdf]
