# Supplementary material for: Antibacterial activities of Miang extracts against selected pathogens and the potential of the tannin-free extracts in the growth inhibition of Streptococcus mutans
Source: PubMed Central journal article supplement (PMC11078415; doi:10.1371/journal.pone.0302717), 2024-05-08
Supplement: pone.0302717.s002.pdf [file pone.0302717.s002.pdf]

| Peak | Class <sup>a</sup> | RT <sup>b</sup><br>(mins) | MW     | Theoretical<br>m/z | [M + H] <sup>+</sup><br>m/z | Mass<br>error<br>(mDa) | Formula                                                      | Tentative identification              | Sample             |
|------|--------------------|---------------------------|--------|--------------------|-----------------------------|------------------------|--------------------------------------------------------------|---------------------------------------|--------------------|
| 1    | PA                 | 4.70                      | 354.31 | 355.1024           | 354.0951                    | 0.069                  | C <sub>16</sub> H <sub>18</sub> O <sub>9</sub>               | Chlorogenic acid                      | YTL, MTL, NFP, FFP |
| 2    | PA                 | 5.27                      | 368.34 | 369.1180           | 368.1107                    | 0.019                  | C <sub>17</sub> H <sub>20</sub> O <sub>9</sub>               | 5-Feruloylquinic acid                 | NFP, FFP           |
| 3    | FL                 | 6.46                      | 302.24 | 303.0499           | 302.0427                    | -0.074                 | C <sub>15</sub> H <sub>10</sub> O <sub>7</sub>               | Quercetin                             | YTL, NFP           |
| 4    | FL                 | 7.04                      | 480.38 | 481.0977           | 480.0904                    | -0.007                 | C <sub>21</sub> H <sub>20</sub> O <sub>13</sub>              | Myricetin-3-galactoside               | YTL, MTL, NFP, FFP |
| 5    | PA                 | 7.50                      | 338.31 | 339.1074           | 338.1002                    | 0.084                  | C <sub>16</sub> H <sub>18</sub> O <sub>8</sub>               | 3-p-Coumaroylquinic acid              | NFP, FFP           |
| 6    | AA                 | 8.27                      | 129.11 | 130.0499           | 129.0426                    | -                      | C <sub>5</sub> H <sub>7</sub> NO <sub>3</sub>                | Pyroglutamic acid                     | YTL, MTL, NFP, FFP |
| 7    | FL                 | 9.06                      | 626.52 | 627.1556           | 626.1483                    | 0.000                  | C <sub>27</sub> H <sub>30</sub> O <sub>17</sub>              | Quercetin dihexoside                  | YTL, MTL, NFP, FFP |
| 8    | PA                 | 10.17                     | 516.45 | 517.1341           | 516.1268                    | 0.003                  | C <sub>25</sub> H <sub>24</sub> O <sub>12</sub>              | Dicaffeoylquinic acid 3               | YTL, MTL, NFP, FFP |
| 9    | F3                 | 13.32                     | 458.37 | 459.0922           | 458.0849                    | 0.029                  | C <sub>22</sub> H <sub>18</sub> O <sub>11</sub>              | Epigallocatechin gallate              | MTL                |
| 10   | PA                 | 15.16                     | 516.45 | 517.1341           | 516.1268                    | 0.035                  | C <sub>25</sub> H <sub>24</sub> O <sub>12</sub>              | Dicaffeoylquinic acid 1               | YTL, MTL, NFP, FFP |
| 11   | OA                 | 16.59                     | 90.08  | 91.0390            | 90.0317                     | -                      | C <sub>3</sub> H <sub>6</sub> O <sub>3</sub>                 | Lactic acid                           | NFP, FFP           |
| 12   | PA                 | 17.30                     | 192.17 | 193.0707           | 192.0634                    | 0.325                  | C <sub>7</sub> H <sub>12</sub> O <sub>6</sub>                | Quinic acid                           | NFP, FFP           |
| 13   | F3                 | 17.94                     | 290.27 | 291.0863           | 290.0790                    | 0.023                  | C <sub>15</sub> H <sub>14</sub> O <sub>6</sub>               | Epicatechin                           | YTL                |
| 14   | PA                 | 20.59                     | 258.19 | 259.0561           | 258.0488                    | -0.003                 | C <sub>9</sub> H <sub>10</sub> N <sub>2</sub> O <sub>7</sub> | Uronic acid                           | MTL, NFP, FFP      |
| 15   | FL                 | 22.33                     | 726.63 | 727.2080           | 726.2007                    | -0.018                 | C <sub>32</sub> H <sub>27</sub> O <sub>14</sub>              | Apigenin-6-C-glucosyl-8-C-arabinoside | FFP                |
| 16   | PA                 | 22.73                     | 170.12 | 171.0288           | 170.0215                    | -0.144                 | C <sub>7</sub> H <sub>6</sub> O <sub>5</sub>                 | Gallic acid                           | NFP, FFP           |
| 17   | PA                 | 24.06                     | 302.19 | 303.0135           | 302.0063                    | 0.074                  | C <sub>14</sub> H <sub>6</sub> O <sub>8</sub>                | Ellagic acid                          | NFP, FFP           |
| 18   | PP                 | 26.57                     | 126.11 | 127.0390           | 126.0317                    | 0.070                  | C <sub>6</sub> H <sub>6</sub> O <sub>3</sub>                 | Pyrogallol                            | NFP, FFP           |
| 19   | PA                 | 35.81                     | 88.11  | 89.0597            | 88.0524                     | -                      | C <sub>4</sub> H <sub>8</sub> O <sub>2</sub>                 | Butyric acid                          | NFP, FFP           |
| 20   | FL                 | 37.54                     | 464.38 | 465.1026           | 464.0955                    | 0.003                  | C <sub>21</sub> H <sub>20</sub> O <sub>12</sub>              | Quercetin-3-glucoside                 | YTL, MTL, FFP      |
| 21   | F3                 | 42.81                     | 306.27 | 307.0812           | 306.0740                    | 0.109                  | C <sub>15</sub> H <sub>14</sub> O <sub>7</sub>               | Gallocatechin                         | MTL                |
