# Supplementary material for: Antibacterial activities of Miang extracts against selected pathogens and the potential of the tannin-free extracts in the growth inhibition of Streptococcus mutans
Source: PubMed Central journal article supplement (PMC11078415; doi:10.1371/journal.pone.0302717), 2024-05-08
Supplement: pone.0302717.s004.pdf [file pone.0302717.s004.pdf]

## Comments

|              | Comments                                                                                                                                                                                                                                                                                                                                                                                                                                                                                                                                                                                                                                                    |
|--------------|-------------------------------------------------------------------------------------------------------------------------------------------------------------------------------------------------------------------------------------------------------------------------------------------------------------------------------------------------------------------------------------------------------------------------------------------------------------------------------------------------------------------------------------------------------------------------------------------------------------------------------------------------------------|
| Title        | This title suitable with the article content                                                                                                                                                                                                                                                                                                                                                                                                                                                                                                                                                                                                                |
| Abstract     | Acceptable. However, suggest to include problem statement                                                                                                                                                                                                                                                                                                                                                                                                                                                                                                                                                                                                   |
| Introduction | <p>Line 58- The statement mention that resilient efforts to combat infectious diseases and pathogenic bacteria (such as Bacillus 58 cereus and Escherichia coli) that cause foodborne illnesses and/or pose serious problems to 59 human health is a <b>current research</b> quest. However, the reference use to support the statement that mention 'current research' is on 2017. Pls find latest references.</p> <p>-The introduction focus on foodborne pathogens issue. However this research do analysis on Streptococcus mutants. Does this strain is classify as foodborne pathogens?</p> <p>-State the justification on the selected pathogens</p> |
| Methodology  | <p>Line 112- Justification on selection of acetone as extraction solvent. We have several types of solvent that normally used in extraction including methanol, ethanol, water and so on.</p> <p>-There is no procedures on the adjustment of extract pH</p>                                                                                                                                                                                                                                                                                                                                                                                                |
| result       | Line 245 and 251. The figures title are similar. Revise the title by adding the pH use cause the both figure display antibacterial activity of extract at different pH                                                                                                                                                                                                                                                                                                                                                                                                                                                                                      |
| Discussion   | Discussion was clearly discuss with appropriate support statement based on previous studies                                                                                                                                                                                                                                                                                                                                                                                                                                                                                                                                                                 |
| Conclusion   | Conclusion is reflect the finding and the article title                                                                                                                                                                                                                                                                                                                                                                                                                                                                                                                                                                                                     |
